# Supplementary material for: Recombinant Arginine Deiminase from Levilactobacillus brevis Inhibits the Growth of Stomach Cancer Cells, Possibly by Activating the Intrinsic Apoptosis Pathway
Source: MDPI journal article supplement (doi:10.3390/ijms25084163), 2024-04-09
Supplement: s1 [file s1]

## Supplementary Materials

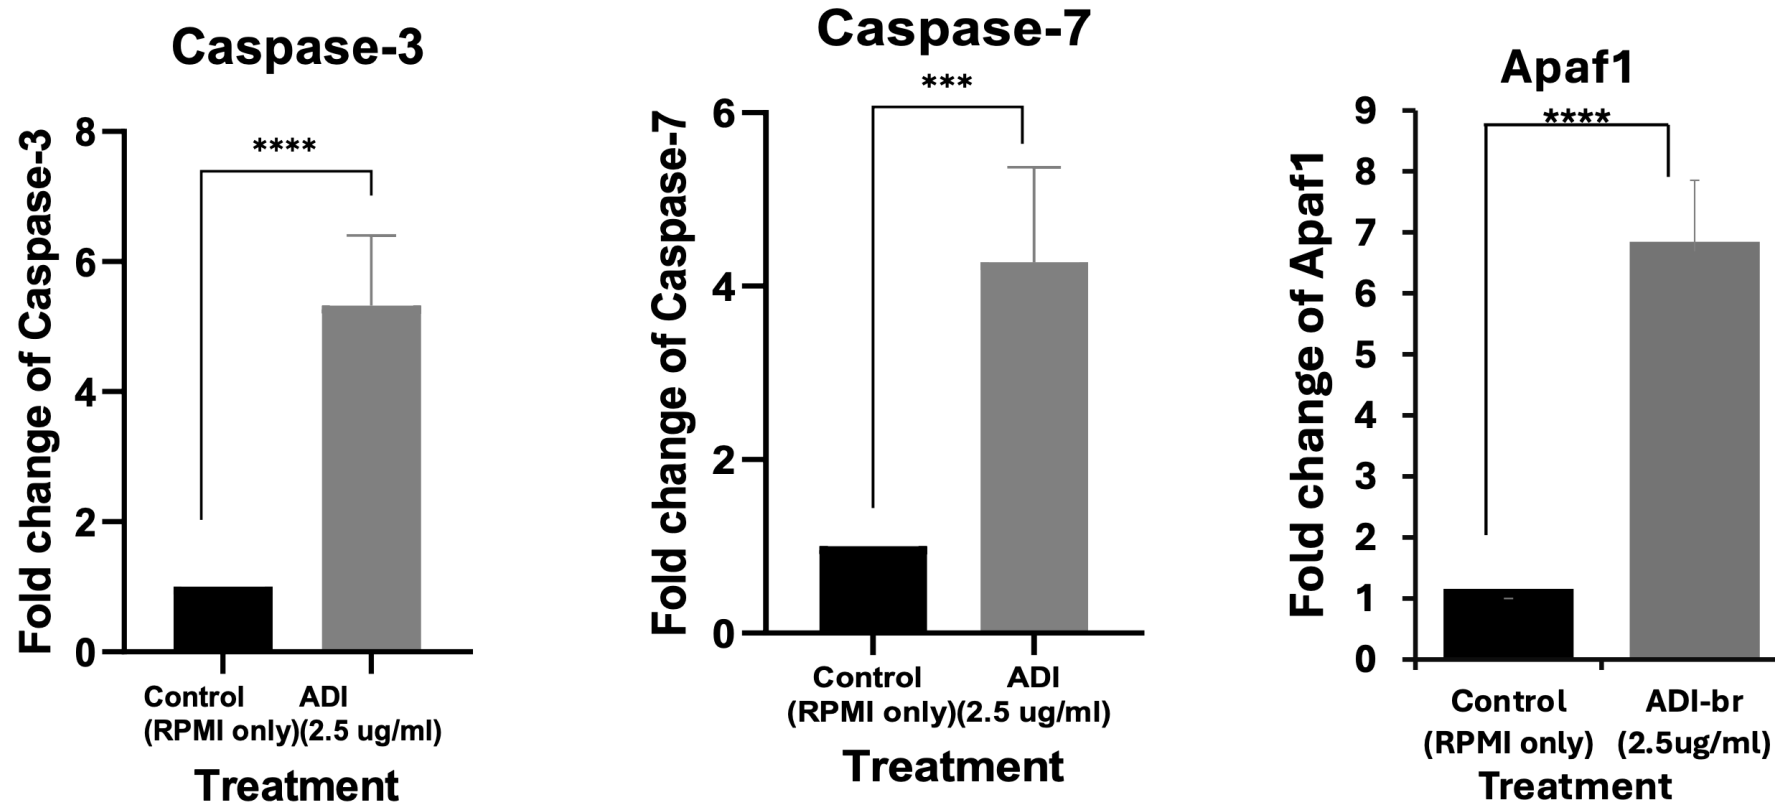

**Figure S1. Preliminary RT-qPCR.** Treatment of ADI\_br (2.5  $\mu$ g/ml) significantly upregulated the expressions (*caspase-3*, *caspase-7*, and *Apaf1*) of the intrinsic apoptosis-related genes.  $\beta$ 2-microglobulin (*B2M*) was used as the internal control for the analysis following the *delta-delta* Cq method. Data presented are means of three replicate readings. Statistical analysis was conducted using one-way ANOVA implemented in GraphPad Prism 8.4.2. \*\*\*\*  $p < 0.0001$ , \*\*\*  $p = 0.0002$ .
